1 **Mutations in *EBF3* disturb transcriptional profiles and underlie a novel syndrome of**  
2 **intellectual disability, ataxia and facial dysmorphism**

3

4 Frederike Leonie Harms<sup>1,23</sup>, Katta Mohan Girisha<sup>2,23</sup>, Andrew A. Hardigan<sup>3,4,23</sup>, Fanny  
5 Kortüm<sup>1</sup>, Anju Shukla<sup>2</sup>, Malik Alawi<sup>5,6,7</sup>, Ashwin Dalal<sup>8</sup>, Lauren Brady<sup>9</sup>, Mark  
6 Tarnopolsky<sup>9</sup>, Lynne M. Bird<sup>10,11</sup>, Sophia Ceulemans<sup>11</sup>, Martina Bebin<sup>12</sup>, Kevin M.  
7 Bowling<sup>3</sup>, Susan M. Hiatt<sup>3</sup>, Edward J. Lose<sup>13</sup>, Michelle Primiano<sup>14</sup>, Wendy K. Chung<sup>14</sup>,  
8 Jane Juusola<sup>15</sup>, Zeynep C. Akdemir<sup>16</sup>, Matthew Bainbridge<sup>17</sup>, Wu-Lin Charng<sup>16</sup>, Margaret  
9 Drummond-Borg<sup>18</sup>, Mohammad K. Eldomery<sup>16</sup>, Ayman W. El-Hattab<sup>19</sup>, Mohammed A.  
10 M. Saleh<sup>20</sup>, Stéphane Bézieau<sup>21</sup>, Benjamin Cogné<sup>21</sup>, Bertrand Isidor<sup>21,22</sup>, Sébastien Küry<sup>21</sup>,  
11 James R. Lupski<sup>16</sup>, Richard M. Myers<sup>3</sup>, Gregory M. Cooper<sup>3</sup>, Kerstin Kutsche<sup>1</sup>

12

13 <sup>1</sup>Institute of Human Genetics, University Medical Center Hamburg-Eppendorf, Hamburg,  
14 Germany

15 <sup>2</sup>Department of Medical Genetics, Kasturba Medical College, Manipal University, Manipal,  
16 India

17 <sup>3</sup>HudsonAlpha Institute for Biotechnology, Huntsville, AL USA

18 <sup>4</sup>Department of Genetics, University of Alabama at Birmingham, AL USA

19 <sup>5</sup>University Medical Center Hamburg-Eppendorf, Bioinformatics Service Facility, Hamburg,  
20 Germany

21 <sup>6</sup>Center for Bioinformatics, University of Hamburg, Hamburg, Germany

22 <sup>7</sup>Heinrich-Pette-Institute, Leibniz-Institute for Experimental Virology, Virus Genomics,  
23 Hamburg, Germany

24 <sup>8</sup>Diagnostics Division, Centre for DNA Fingerprinting and Diagnostics, Hyderabad,  
25 Telangana, India

26 <sup>9</sup>Department of Pediatrics, McMaster University Medical Center, Hamilton, Ontario,  
27 L8N 3Z5, Canada

28 <sup>10</sup>Department of Pediatrics, University of California, San Diego, CA 92123, USA

29 <sup>11</sup>Division of Genetics/Dysmorphology, Rady Children's Hospital San Diego, San Diego, CA  
30 92123, USA

31 <sup>12</sup>Department of Neurology, University of Alabama at Birmingham, Birmingham, AL USA

32 <sup>13</sup>Department of Genetics, University of Alabama at Birmingham, Birmingham, AL USA

33 <sup>14</sup>Department of Pediatrics and Medicine, Columbia University, New York NY 10032, USA

34 <sup>15</sup>GeneDx, Gaithersburg, MD 20877, USA

35 <sup>16</sup>Department of Molecular and Human Genetics, Baylor College of Medicine, Houston, TX  
36 77030, USA

37 <sup>17</sup>Human Genome Sequencing Center, Baylor College of Medicine, Houston, Texas, USA

38 <sup>18</sup>Cook Children's Genetic Clinic, Fort Worth, Texas, USA

39 <sup>19</sup>Division of Clinical Genetics and Metabolic Disorders, Department of Pediatrics, Tawam  
40 Hospital, Al-Ain, United Arab Emirates

41 <sup>20</sup>Section of Medical Genetics, Children's Hospital, King Fahad Medical City, Riyadh, Saudi

42 Arabia

43 <sup>21</sup>CHU Nantes, Service de Génétique Médicale, Nantes CEDEX 1, France

44 <sup>22</sup>INSERM, UMR-S 957, Nantes, France

45 <sup>23</sup>These authors contributed equally to this work.

46

47

48 **Corresponding authors:**

49 Kerstin Kutsche, PhD

50 Institute of Human Genetics

51 University Medical Center Hamburg-Eppendorf

52 Martinstraße 52

53 20246 Hamburg

54 Germany

55 phone: +49-40-741054597

56 email: [kkutsche@uke.de](mailto:kkutsche@uke.de)

57

58 Gregory M. Cooper, PhD

59 HudsonAlpha Institute for Biotechnology

60 601 Genome Way

61 Huntsville, AL 35806

62 USA

63 phone: 256-327-9490

64 email: [gcooper@hudsonalpha.org](mailto:gcooper@hudsonalpha.org)

65

66 Katta Mohan Girisha, MD

67 Department of Medical Genetics

68 Kasturba Medical College

69 Manipal University

70 Manipal-576104

71 India

72 phone: +91-820-2923149

73 email: [girish.katta@manipal.edu](mailto:girish.katta@manipal.edu)

74

75

76 **Abstract**

77 From a GeneMatcher-enabled international collaboration, we identified ten individuals with  
78 intellectual disability, speech delay, ataxia and facial dysmorphism and a mutation in *EBF3*,  
79 encoding a transcription factor required for neuronal differentiation. Structural assessments,  
80 transactivation assays, *in situ* fractionation, RNA-seq and ChIP-seq experiments collectively  
81 show that the mutations are deleterious and impair EBF3 transcriptional regulation. These  
82 findings demonstrate that EBF3-mediated dysregulation of gene expression has profound  
83 effects on neuronal development in humans.

84

85

86 Intellectual disability (ID) is a common phenotype with extreme clinical and genetic  
87 heterogeneity. Widespread application of whole-genome and whole-exome sequencing  
88 (WES) has tremendously increased the elucidation of the genetic causes of non-syndromic  
89 and syndromic forms of ID<sup>1,2</sup>. WES together with the freely accessible tool GeneMatcher  
90 (<http://genematcher.org>) which brings together clinicians and researchers with an interest in  
91 the same gene, significantly aid in identifying new disease genes<sup>3</sup>.

92 We investigated a family with three healthy and two affected children, who both  
93 presented with global developmental delay, febrile seizures, and gait instability with frequent  
94 falls. WES was performed in both probands and one healthy sibling. We initially  
95 hypothesized a Mendelian recessive trait; however, we did not identify any rare, potentially  
96 pathogenic biallelic variants in the affected siblings (data not shown). WES data were  
97 analyzed for heterozygous variants absent in dbSNP138, 1000 Genomes Project, Exome  
98 Variant Server, and ExAC Browser, shared by both affected subjects and absent in the healthy  
99 sibling. This analysis identified 16 variants (**Supplementary Table 1**). We used objective  
100 metrics from ExAC to prioritize genes intolerant to functional variation ( $pLI \geq 0.9$  and high  
101 values for  $Z$  score) (**Supplementary Table 1**)  
102 (<http://biorxiv.org/content/early/2015/10/30/030338>); five genes were identified with strong  
103 selection against various classes of variants for segregation analysis in the family  
104 (**Supplementary Table 1**). Four variants were inherited from a healthy parent and/or were  
105 present in two healthy siblings (**Supplementary Table 2**). The missense variant c.625C>T  
106 [p.(Arg209Trp)] in *EBF3* was confirmed in both affected siblings and was absent in the father  
107 and all healthy siblings (**Supplementary Fig. 1a** and **Supplementary Table 2**). In leukocyte-  
108 derived DNA from the mother, the Sanger sequence profile showed a very low signal for the  
109 mutated base (thymine) superimposed on the wild-type sequence (cytosine) suggesting that  
110 she had somatic mosaicism for the *EBF3* variant (**Supplementary Fig. 1a**)<sup>4</sup>. By cloning the  
111 mutation-bearing *EBF3* amplicon followed by sequencing of colony PCR products, we

112 confirmed the mother to be a mosaic carrier (18% and 4% of leukocytes and buccal cells,  
113 respectively, were heterozygous for the *EBF3* variant) (**Supplementary Fig. 1b**);  
114 parenthetically, maternal mosaics are at greater recurrence risk<sup>4</sup>. Given that *EBF3* is intolerant  
115 to functional genetic variation (**Supplementary Table 1**)<sup>5,6</sup> and the variant p.(Arg209Trp)  
116 was computationally predicted to be deleterious (**Supplementary Table 3**), we next  
117 submitted *EBF3* to GeneMatcher and were matched with eight other research groups.

118 In addition to the above family, eight unrelated affected individuals with variants in  
119 *EBF3* were identified through WES by groups that independently submitted to GeneMatcher.  
120 In addition to c.625C>T [p.(Arg209Trp)], we found the four non-synonymous variants  
121 c.196A>G [p.(Asn66Asp)] in subject 4, c.512G>A [p.(Gly171Asp)] in subject 8, c.530C>T  
122 [p.(Pro177Leu)] in subject 6, and c.422A>G [p.(Tyr141Cys)] in subject 7, the 9-bp  
123 duplication c.469\_477dup [p.(His157\_Ile159dup)] in subject 10, the nonsense variants  
124 c.913C>T [p.(Gln305\*)] in subject 3 and c.907C>T [p.(Arg303\*)] in subject 9, as well as the  
125 splice site mutation c.1101+1G>T in subject 5 (**Fig. 1a,b** and **Supplementary Table 3**). All  
126 variants were predicted to impact protein function (**Supplementary Table 3**), and were  
127 absent in 1000 Genomes Browser, Exome Variant Server, and ExAC Browser. All eight  
128 additional variants were confirmed to have arisen *de novo* (**Supplementary Table 4**). The *in-*  
129 *frame* duplication and the five amino acid substitutions affect residues conserved through  
130 evolution and invariant among paralogs (**Supplementary Fig. 2**).

131 Consistent clinical features in all individuals with *EBF3* mutation were intellectual  
132 disability, speech delay and motor developmental delay (10/10). Ataxia was reported in 6/8  
133 and seizures in 2/9. Brain imaging revealed cerebellar vermian hypoplasia in 2/8  
134 (**Supplementary Table 4**). Facial dysmorphism was mild and commonly seen features  
135 include long face, tall forehead, high nasal bridge, deep philtrum, straight eyebrows,  
136 strabismus, and short and broad chin (**Fig. 1c**).

137 *EBF3* encodes the early B-cell factor 3, which is one of four members of the EBF  
138 transcription factor family (also known as Olf, COE, or O/E). All EBFs consist of an N-  
139 terminal DNA-binding domain (DBD), an IPT (Ig-like/plexins/transcription factors) domain  
140 with yet unknown function, a helix-loop-helix (HLH) domain, which is critical for homo- and  
141 heterodimer formation, and a C-terminal transactivation domain (TAD) (**Fig. 1b**)<sup>7</sup>. EBF1 has  
142 been discovered as a key factor for B-cell differentiation<sup>8</sup> and olfactory nerve signaling<sup>9</sup>.  
143 However, expression of *ebf1*, *ebf2* and *ebf3* in early post-mitotic neurons during  
144 embryogenesis suggested a role in neuronal differentiation and maturation<sup>10</sup>. Ebf3 acts  
145 downstream of the proneural transcription factor neuroD in late neural differentiation in  
146 *Xenopus*<sup>11</sup> and is transcriptionally repressed by ARX<sup>12</sup>, abnormalities of which cause a  
147 spectrum of developmental disorders ranging from ID to brain malformation syndromes<sup>13</sup>.  
148 Silencing, genomic deletion and somatic point mutations [p.(Arg243Trp) and  
149 p.(Trp265Cys)]<sup>14,15</sup> of *EBF3* in diverse types of cancer as well as EBF3-mediated induction of  
150 cell cycle arrest and apoptosis suggest that EBF3 acts as a tumor suppressor by regulating the  
151 expression of specific target genes and controlling a potential anti-neoplastic pathway<sup>7</sup>. All  
152 germline *EBF3* missense variants and the tumor-specific mutation p.(Arg243Trp) are located  
153 in the DBD (**Fig. 1b** and **Supplementary Fig. 2**). Interaction of the DBD with DNA is  
154 dependent on a zinc-coordination motif, the zinc knuckle (COE motif), located between  
155 His157 and Cys170 (**Supplementary Fig. 2**). Thus, the p.(His157\_Ile159dup) variant most  
156 likely affects DNA-binding as has been shown for the EBF3<sup>H157A</sup> mutant<sup>16,17</sup>.

157 The structural impact of the five missense mutations was explored by a homology model  
158 for the DNA-bound configuration of the DBD of EBF3 with the DNA duplex containing the  
159 EBF1 consensus sequence<sup>18</sup>. Two of the five alterations, p.(Asn66Asp) and p.(Gly171Asp),  
160 were predicted to directly affect DNA binding (**Supplementary Fig. 3a-c**). Pro177 is  
161 localized in close proximity to the zinc finger (His157, Cys161, Cys164 and Cys170) and to  
162 Asn174, which forms a hydrogen bond with DNA. Replacement of Pro177 by leucine causes

163 a conformational change, probably affecting correct positioning of the zinc knuckle and  
164 destabilizing the protein-DNA complex (**Supplementary Fig. 3d**). Arg209 does not directly  
165 interact with DNA, but forms hydrogen bonds with the backbone of Cys198 and Asn197, the  
166 latter directly interacting with DNA. The change of Arg209Trp is expected to alter  
167 positioning of Asn197 and binding affinity for DNA (**Supplementary Fig. 3e**). Tyr141 is  
168 localized within a loop probably involved in EBF3 dimer formation. Substitution of this  
169 residue may lead to a conformational change at the dimer interface, resulting in reduced  
170 stability of the EBF3 dimer and interfering with its ability to interact with DNA  
171 (**Supplementary Fig. 3f**).

172 To analyze the functional effect of the *EBF3* mutations, all mutant proteins were  
173 transiently and efficiently expressed in HEK 293T cells. By confocal microscopy analysis, we  
174 confirmed exclusive nuclear localization of wild-type EBF3 (**Fig. 2a**). In contrast, all but one  
175 mutant protein showed nuclear localization or both nuclear and cytoplasmic distribution. Only  
176 the mutant lacking 202 amino acids at the C-terminus was almost entirely mislocalized to the  
177 cytoplasm (**Fig. 2a**). We next performed a reporter gene assay to assess whether EBF3  
178 mutants still mediate transcriptional activation of the target gene *CDKN1A* (p21)<sup>16</sup>. Similar to  
179 p53, for which *CDKN1A* is a prototypical target gene, expression of wild-type EBF3  
180 markedly increased the reporter activity driven by the *CDKN1A* promoter (**Fig. 2b**). In  
181 contrast, EBF3 mutants had significantly reduced or no ability to activate transcription of the  
182 reporter gene (**Fig. 2b**). *CDKN1A* promoter activation was not significantly reduced when  
183 EBF3<sup>WT</sup> was co-expressed with either of the mutants p.Gly171Asp, p.Pro177Leu and  
184 p.Arg209Trp (**Supplementary Fig. 4a**). In contrast, co-expression of wild-type EBF3 and  
185 each of the mutants p.Asn66Asp, p.Tyr141Cys, p.His157\_Ile159dup, p.Arg303\*, and  
186 p.Gln305\* caused a significant reduction in reporter activity by 40-50% (**Supplementary Fig.**  
187 **4a**), suggesting a potential dominant-negative impact of these mutations on the wild-type  
188 allele. The dominant-negative effect was also observed when expressing increasing amounts

189 of the EBF3 mutant p.Asn66Asp or p.Gln305\* in the presence of a fixed amount of wild-type  
190 EBF3, demonstrating dose-dependent reduction in reporter gene activity (**Supplementary**  
191 **Fig. 4b**). However, the observed nonsense variants are predicted to undergo nonsense-  
192 mediated mRNA decay *in vivo*, and our data also suggest that the truncated protein  
193 p.Gln305\*, if it was produced *in vivo*, would not localize to the nucleus. Thus, it remains  
194 unclear to what extent pathogenesis results from dominant-negative or loss-of-function  
195 mechanisms.

196 To study interaction of EBF3 mutants with chromatin, we performed *in situ* subcellular  
197 fractionation. Transiently transfected HEK 293T cells, expressing either wild-type EBF3 or  
198 one of the mutants p.Arg209Trp, p.Asn66Asp, p.Pro177Leu, p.Tyr141Cys, and p.Gln305\*  
199 were treated to extract cytoplasmic proteins followed by selective extraction of non-tightly  
200 chromatin-bound proteins and free protein aggregates within the nucleus. Detection of Flag-  
201 tagged EBF3 proteins by immunoblotting demonstrated all mutants to be present in both the  
202 cytoplasmic and the nuclear fraction (**Fig. 2c**). In contrast, wild-type EBF3 was absent in the  
203 fraction containing cytoplasmic proteins and only barely detectable in the nuclear fraction  
204 indicating that in contrast to EBF3 mutants the wildtype is tightly associated with chromatin  
205 (**Fig. 2c**).

206 To further test the hypothesis that the *EBF3* variants impact EBF3 DNA-binding and  
207 have regulatory consequences, we transfected SK-N-SH cells with *EBF3*<sup>WT</sup> and *EBF3*<sup>P177L</sup>  
208 cDNA overexpression constructs, stably selected the cells for integration and expression, and  
209 then performed RNA-sequencing. Overexpression of *EBF3*<sup>WT</sup> or *EBF3*<sup>P177L</sup> resulted in 1,712  
210 or 509, respectively, differentially expressed transcripts relative to untransfected cells  
211 (FDR<0.05; **Fig. 3a,b** and **Supplementary Fig. 5**). Significantly enriched Gene Ontology  
212 terms associated with *EBF3*<sup>WT</sup> expression include various neuronal development and  
213 signaling pathways, supporting a broad role for EBF3 in neurodevelopment (**Supplementary**  
214 **Fig. 6**). In contrast, *EBF3*<sup>P177L</sup> did not yield as significant an enrichment in



215 neurodevelopmental pathways. Overall, analyses of the SK-N-SH  $EBF3^{WT}$  and  $EBF3^{P177L}$   
216 transcriptomes indicate that EBF3 targets a wide variety of genes and the p.Pro177Leu  
217 mutation leads to a reduction in the extent of  $EBF3$ -mediated gene regulation.

218 To determine if  $EBF3^{P177L}$  affects binding of EBF3 across the genome, we performed  
219 chromatin immunoprecipitation coupled with massively parallel sequencing (ChIP-seq) in  
220 both  $EBF3^{WT}$  and  $EBF3^{P177L}$  transfected SK-N-SH cells. There were 21,046 binding sites  
221 identified for  $EBF3^{WT}$  and 4,193 binding sites for  $EBF3^{P177L}$ , of which 4,081 were shared  
222 (**Fig. 3c**) – i.e.,  $EBF3^{P177L}$  binds to a subset of  $EBF3^{WT}$  binding sites. MEME-Suite motif  
223 analysis<sup>19</sup> identified an enrichment for the canonical EBF zinc binding motif in called peaks  
224 from both wild-type and mutant protein expressing lines (**Fig. 3c**). We then investigated  
225 whether or not  $EBF3^{WT}$  binding sites in our ChIP-seq data were enriched for closer proximity  
226 to gene transcriptional start sites (TSS) than  $EBF3^{P177L}$  binding sites. Compared to  $EBF3^{P177L}$ ,  
227  $EBF3^{WT}$  binding sites were significantly more likely to reside near gene TSSs (K-S  $p < 0.05$ )  
228 and genes differentially expressed in  $EBF3^{WT}$  were enriched for closer proximity to binding  
229 site peaks than non-significant genes (**Fig. 3d**). To determine if  $EBF3^{WT}$  proximal binding  
230 sites have some functional transcriptional consequence that is altered by the p.Pro177Leu  
231 mutation, we compared  $\log_2$  fold-changes for  $EBF3^{WT}$  significantly differentially expressed  
232 genes with a TSS within 5 kb of shared  $EBF3^{WT}$  and  $EBF3^{P177L}$  binding sites. These genes  
233 had comparatively smaller  $\log_2$  fold-changes in  $EBF3^{P177L}$  samples relative to  $EBF3^{WT}$  (**Fig.**  
234 **3e**), indicating that the p.Pro177Leu mutation appears to lead to reduced transcriptional  
235 alteration. Taken together, these findings are consistent with EBF3 acting as a proximal  
236 regulator of transcription at *cis*-regulatory sequences and supports the hypothesis that  
237  $EBF3^{P177L}$  has reduced function due to partial disruption of the DNA-binding domain.

238 In conclusion, our results show that *de novo* mutations disrupting the regulatory functions  
239 of the conserved neurodevelopmental transcription factor EBF3 underlie a new syndrome of  
240 intellectual disability, ataxia and facial dysmorphism. This phenotype, while rare, is a

241 substantial contributor to intellectual disability. Two patients studied here were found in a  
242 single Clinical Sequencing Exploratory Research study<sup>20</sup> on a series of 317 unrelated families.  
243 Additionally, 5 *de novo* protein altering variants (2 missense, 1 frameshift, 2 splice) in *EBF3*  
244 have recently been reported in a series of 4,293 families with individuals with developmental  
245 disorders, although neither these variants nor *EBF3* were discussed nor concluded to be  
246 pathogenic (preprint data available at <http://biorxiv.org/content/early/2016/04/22/049056>).  
247 Both missense variants are located in the DNA-binding domain of *EBF3* and one,  
248 p.(Pro177Leu), is identical to a mutation in this study, indicating mutational recurrence.  
249 Combining these observations with our own analyses indicates that mutations in *EBF3* may  
250 underlie more than 1 in 1,000 individuals affected with otherwise unexplained developmental  
251 delay. Our study furthermore underscores the importance of data sharing and collaborative  
252 human genetics, with tools like GeneMatcher promoting the assembly of patient cohorts that  
253 enable identification of novel genetic contributions to disease and functionally annotate the  
254 human genome.  
255  
256 **URLs.** Online Mendelian Inheritance in Man (OMIM), <http://www.omim.org/>; NCBI Gene  
257 database, <http://www.ncbi.nlm.nih.gov/gene/>; ExAC Browser, <http://exac.broadinstitute.org/>;  
258 Exome Variant Server (EVS), <http://evs.gs.washington.edu/EVS/>; dbSNP,  
259 <http://www.ncbi.nlm.nih.gov/SNP/>; 1000 Genomes Project <http://www.1000genomes.org/>;  
260 Genic intolerance, <http://genic-intolerance.org/>;  
261 Genematcher, <http://www.genematcher.org/>; NCBI HomoloGene,  
262 <http://www.ncbi.nlm.nih.gov/homologene/>; Clustal Omega  
263 <http://www.ebi.ac.uk/Tools/msa/clustalo/>; SWISS-MODEL, <http://swissmodel.expasy.org/>;  
264 UCSF Chimera, <http://www.cgl.ucsf.edu/chimera/>; Protein Data Bank (PDB),  
265 <http://www.rcsb.org/pdb/home/home.do>; database for nonsynonymous SNPs' functional  
266 predictions (dbNSFP), <https://sites.google.com/site/jpopgen/dbNSFP>;

267

## 268 **ACKNOWLEDGEMENTS**

269 We are grateful to the patients and their families who contributed to this study. We would like  
270 to thank members of the HudsonAlpha CSER team, especially Shirley Simmons, Kelly East,  
271 Whitley Kelley, Candice Finnila, David Gray, Michelle Amaral, and Michelle Thompson,  
272 Ryne Ramaker for help with sequencing data analysis, Verena Kolbe for skillful technical  
273 assistance, Hans-Jürgen Kreienkamp for help with structural analysis and critical reading,  
274 Stefan Kindler and Claudia Schob for helpful suggestions and technical advice with the  
275 luciferase assay, and the UKE Microscopy Imaging Facility (UMIF) for technical support.  
276 This work was supported by grants from the US National Human Genome Research Institute  
277 (NHGRI) (UM1HG007301), the US National Institutes of Health (1R21NS094047-01), the  
278 NHGRI/National Heart Lung and Blood Institute (NHLBI) [No. HG006542 to the Baylor-  
279 Hopkins Center for Mendelian Genomics (BHCMG)], the UAB MSTP (NIH-NIGMS  
280 5T32GM008361-21 to A.H.), the Simons Foundation (to W.K.C.), and the Deutsche  
281 Forschungsgemeinschaft (KO 4576/1-1 and 1-2 to F.K. and KU 1240/10-1 to K.K.). W.-L.C.  
282 was supported by The Cancer Prevention & Research Institute of Texas (CPRIT) training  
283 Program RP140102.

284

## 285 **AUTHOR CONTRIBUTIONS**

286 F.L.H. performed WES, exome data interpretation, mutation validation and segregation  
287 analysis for family 1, cloning, structural analysis, immunocytochemistry, microscopy,  
288 transactivation assay, *in situ* subcellular fractionation and wrote the manuscript. K.M.G.,  
289 A.S. and A.D. recruited and clinically characterized subjects of family 1, collected  
290 biological samples, evaluated and summarized clinical data and wrote the manuscript.  
291 A.A.H. performed the ChIP-seq, RNA-seq, and related experiments and analyses and  
292 wrote the manuscript. F.K. performed WES and data interpretation for family 1. M.A.

293 performed bioinformatics WES data processing and analysis for family 1. L.B. and M.T.  
294 recruited and clinically characterized subjects of family 2 and collected biological samples.  
295 L.M.B. and S.C. recruited and clinically characterized subjects of family 3 and collected  
296 biological samples. E.J.L and M.B. recruited and clinically characterized subjects of  
297 families 4 and 5 and collected biological samples. K.M.B. and S.M.H. performed the  
298 genomic analyses to identify the *EBF3* variants in families 4 and 5. W.K.C. recruited and  
299 clinically characterized subjects of family 6 and collected biological samples. M.K.E.,  
300 Z.C.A., W.-L.C. and M.B. performed rare variant analysis of WES data in families 7 and 8  
301 and segregation studies. M.D.-B. recruited and clinically characterized subjects of family 7  
302 and collected biological samples. A.W.E.-H. and M.A.M.S. recruited and clinically  
303 characterized subjects of family 8 and collected biological samples. S.B. contributed to  
304 phenotype and biological samples collection, and to WES as investigator of the study for  
305 family 9. B.C. performed bioinformatic analyses and evaluated and interpreted WES data  
306 for family 9. B.I. recruited and clinically characterized subjects of family 9 and collected  
307 biological samples. S.K. contributed to collection of family 9 information, evaluated and  
308 interpreted WES data and wrote the manuscript. J.R.L. was in charge of the experimental  
309 design and analyses of data and supervised studies for families 7 and 8. G.M.C. and  
310 R.M.M. designed the study on families 4 and 5 (WES, ChIP-seq, RNA-seq, and related  
311 experiments), guided implementation across all components and wrote the manuscript.  
312 K.K. conceived the project, analyzed and interpreted the data, and wrote the manuscript.  
313 All authors contributed to and approve of the manuscript.

314

#### 315 **COMPETING FINANCIAL INTERESTS**

316 The authors declare no competing financial interest.

317

#### 318 **FIGURE LEGENDS**

319 **Figure 1** *EBF3* mutations identified in ten patients. (a) Schematic representation of the exon-  
320 intron structure of *EBF3*. Black bars represent exons and black lines introns. Germline  
321 mutations identified in the patients are shown in blue. (b) Domain structure of the EBF3  
322 protein with the positions of the identified mutations. *EBF3* germline mutations are indicated  
323 in blue and tumor-associated mutations in dark grey. Amino acid numbers are given. DBD:  
324 DNA-binding domain with an atypical zinc finger (ZNF; COE motif); IPT: Ig-  
325 like/plexins/transcription factors; HLH: helix-loop-helix motif; TAD: transactivation domain.  
326 (c) Photographs of six patients show subtle, yet distinct facial dysmorphism. Long face, tall  
327 forehead, high nasal bridge, deep philtrum, straight eyebrows, strabismus, short and broad  
328 chin and mildly dysmorphic ears can be noted in all. Consent for the publication of  
329 photographs was obtained for the six subjects.

330

331 **Figure 2** EBF3 mutants show impaired DNA-binding and altered subcellular localization. (a)  
332 Epifluorescence microscopy analysis was performed in HEK 293T cells transiently  
333 expressing wild-type or mutant EBF3 (green). Nuclei were stained with DAPI (blue). Wild-  
334 type EBF3 is exclusively localized in the nucleus, while the DNA-binding deficient mutant  
335 EBF3<sup>H157A</sup> and the disease-associated mutants EBF3<sup>N66D</sup>, EBF3<sup>Y141C</sup>, EBF3<sup>G171D</sup>,  
336 EBF3<sup>H157\_I159dup</sup>, EBF3<sup>P177L</sup>, EBF3<sup>R209W</sup>, and EBF3<sup>R303\*</sup> are also located in the cytoplasm.  
337 EBF3<sup>Q305\*</sup> is mainly localized in the cytoplasm. Representative images are shown. Bars  
338 correspond to 10 μm. (b) EBF3 mutants show impaired activation of luciferase reporter  
339 expression under the control of the *CDKN1A* (p21) promoter. HEK 293T cells were  
340 transiently transfected with EBF3 expression constructs or wild-type p53 as an internal  
341 control. Dual luciferase assays were done with the extracts of transfected cells 48 hours after  
342 transfection. Expression of wild-type EBF3 (green bar) and p53 (black bar) lead to a 4- to 5-  
343 fold elevated promoter activity compared with cells transiently transfected with empty vector  
344 (control; white bar). The DNA binding-deficient EBF3<sup>H157A</sup> mutant (yellow bar) and all

345 disease-associated EBF3 mutants (blue bars) showed a strongly reduced or no activation of  
346 the luciferase reporter. The normalized luciferase activity (mean  $\pm$  s.d.) of three independent  
347 experiments is depicted as the fold induction relative to cells transfected with a control vector.  
348 All comparisons are in reference to wild-type EBF3, and *P* values were calculated using the  
349 two-sided Student's *t* test. **\*\**P* < 0.005.** (c) EBF3 mutants are not tightly bound to chromatin.  
350 Transiently transfected HEK 293T cells were incubated with CSK buffer containing 0.1%  
351 Triton-X. The cytoplasmic extracts were removed and proteins precipitated. Cells were  
352 subsequently treated with CSK buffer supplemented with 0.5% Triton-X. Nuclear extracts  
353 were removed and proteins precipitated. Total cell lysate (TCL), cytoplasmic fraction (CF),  
354 and nuclear fraction (NF) were analyzed by SDS-PAGE and immunoblotting using an anti-  
355 Flag antibody. The mutant EBF3 proteins are present in both the CF and NF. In marked  
356 contrast, wild-type EBF3 is present in only minimal amount in the NF demonstrating  
357 exclusive nuclear localization and strong chromatin binding. Expression of EBF3 protein  
358 variants was monitored by immunoblotting using anti-flag antibody, and anti-GAPDH  
359 antibody was used to control for equal loading. Data shown are representative of four  
360 independent experiments.

361

362 **Figure 3** EBF3<sup>P177L</sup> overexpression shows reduced transcriptome alteration and whole-  
363 genome EBF occupancy compared to EBF3<sup>WT</sup>. (a) EBF3<sup>P177L</sup> reduces transcriptome alteration  
364 induced by *EBF3* expression relative to EBF3<sup>WT</sup>. Genes identified as significantly  
365 differentially expressed between SK-N-SH cells (control) and EBF3<sup>WT</sup> and EBF3<sup>P177L</sup> by  
366 DESeq2 with an adjusted p-value (FDR) < 0.05, with 197 shared differentially expressed  
367 genes between EBF3<sup>WT</sup> and EBF3<sup>P177L</sup>. (b) A heatmap of DESeq2 variance-stabilized RNA-  
368 seq expression values comparing control (CTL), EBF3<sup>WT</sup> and EBF3<sup>P177L</sup> samples for genes  
369 determined to be significantly different between EBF3<sup>WT</sup> and control SK-N-SH cells. (c)  
370 EBF3<sup>P177L</sup> reduces genome-wide EBF3 binding-sites determined by CHIP-seq (bottom). CHIP-

371 seq was performed using a high-affinity anti-FLAG antibody targeting the C-terminal 3X-  
372 FLAG epitope of the *EBF3* expression vectors. Most significant motifs with centrally  
373 enriched distribution for  $EBF3^{WT}$  and  $EBF3^{P177L}$  were identified using MEME-Suite (top). (d)  
374  $EBF3^{WT}$  binding sites are enriched for closer proximity to nearest gene transcriptional start  
375 site (TSS) compared to  $EBF3^{P177L}$  binding sites. Cumulative Distribution Function (CDF) plot  
376 of  $EBF3^{WT}$  and  $EBF3^{P177L}$  shows binding sites and their distance to nearest GRCh37 gene  
377 TSS for genes identified as upregulated or downregulated (FDR<0.05,  $\log_2$  fold change >0  
378 and <0, respectively) compared to all genes. (e)  $EBF3^{WT}$  significantly differentially expressed  
379 genes with TSS within 5 kb of shared ChIP-seq binding sites exhibit relatively greater  
380 positive and negative  $\log_2$  fold-change than the same genes in  $EBF3^{P177L}$  expression data.  
381 Linear regression of  $\log_2$  fold-change values for these genes (n=306) exhibits a significantly  
382 downward-skewed slope of 0.54 (blue line) compared to the null expectation of perfect  
383 correspondence (slope = 1, dashed red line), indicating comparatively reduced alteration of  
384 expression for significant  $EBF3^{WT}$  genes by  $EBF3^{P177L}$ .

385

## 386 REFERENCES

- 387 1. de Ligt, J. *et al. N Engl J Med* **367**, 1921–1929 (2012).
- 388 2. Gilissen, C. *et al. Nature* **511**, 344–347 (2014).
- 389 3. Sobreira, N., Schiettecatte, F., Valle, D. & Hamosh, A. *Hum Mutat* **36**, 928–930  
390 (2015).
- 391 4. Campbell, I.M., Shaw, C.A., Stankiewicz, P. & Lupski, J.R. *Trends Genet* **31**,  
392 382–392 (2015).
- 393 5. Petrovski, S. *et al. PLoS Genet* **9**, e1003709 (2013).
- 394 6. Samocha, K.E. *et al. Nat Genet* **46**, 944–950 (2014).
- 395 7. Liao, D. *Mol Cancer Res* **7**, 1893–1901 (2009).

- 396 8. Boller, S. & Grosschedl, R. *Immunol Rev* **261**, 102–115 (2014).
- 397 9. Wang, M.M. & Reed, R.R. *Nature* **364**, 121–126 (1993).
- 398 10. Garel, S. *et al. Dev Dynam* **210**, 191–205 (1997).
- 399 11. Pozzoli, O. *et al. Dev Biol* **233**, 495–512 (2001).
- 400 12. Quille, M.L. *et al. PLoS One* **6**, e25181 (2011).
- 401 13. Olivetti, P.R. & Noebels, J.L. *Curr Opin Neurobiol* **22**, 859–865 (2012).
- 402 14. Jones, S. *et al. Science* **321**, 1801–1806 (2008).
- 403 15. Parsons, D.W. *et al. Science* **321**, 1807–1812 (2008).
- 404 16. Zhao, L.Y. *et al. Cancer Res* **66**, 9445–9452 (2006).
- 405 17. Fields, S. *et al. Mol Immunol* **45**, 3786–3796 (2008).
- 406 18. Treiber, N., Treiber, T., Zocher, G. & Grosschedl, R. *Genes Dev* **24**, 2270–2275  
407 (2010).
- 408 19. Bailey, T.L. *et al. Nucleic Acids Res* **37**, W202–W208 (2009).
- 409 20. Green, R.C. *et al. Am J Hum Genet* **98**, 1051–1066 (2016).

410

411



# Figure 1

**a**

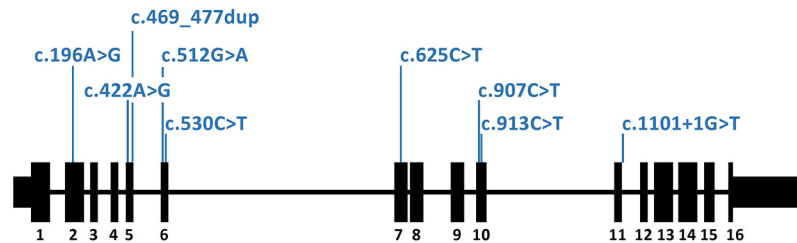

**b**

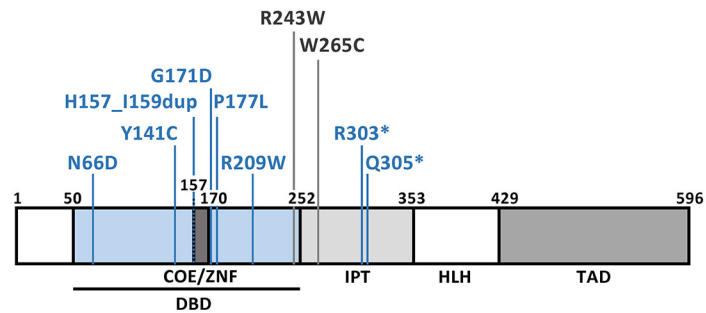

**c**

**Figure 2****a**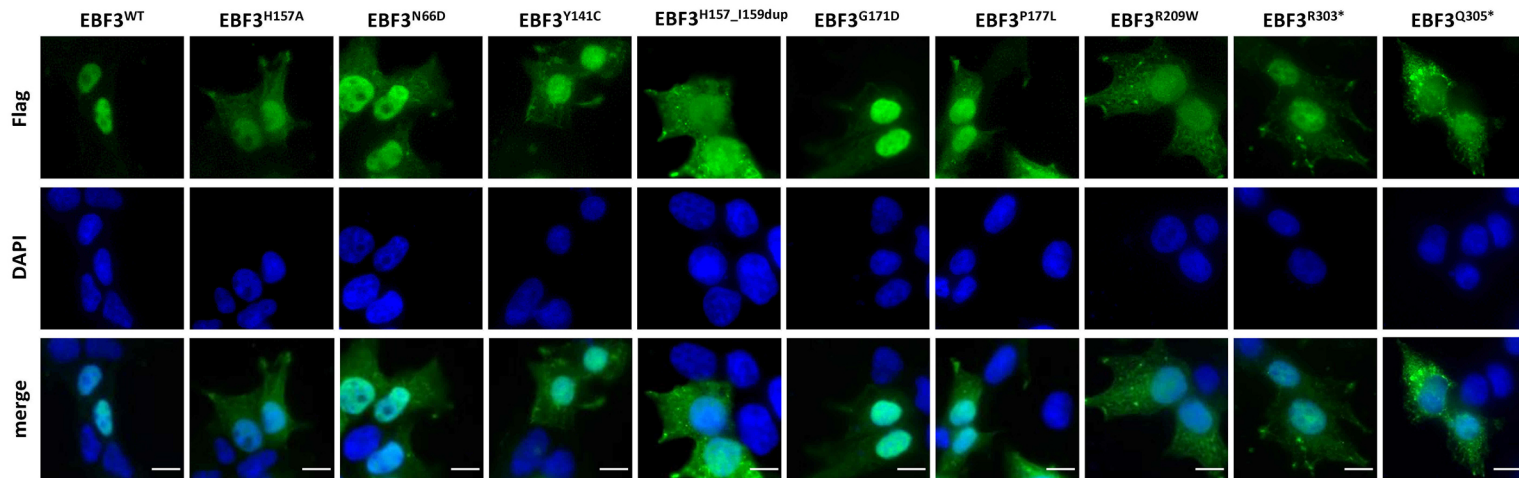**b**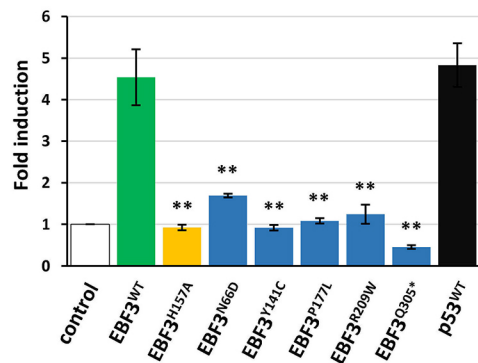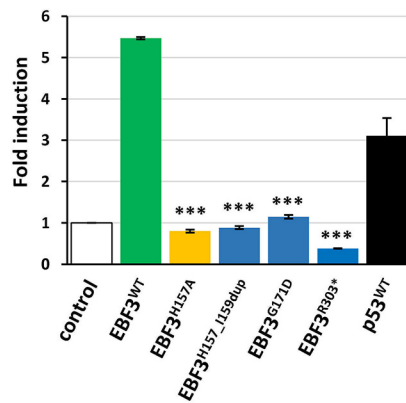**c**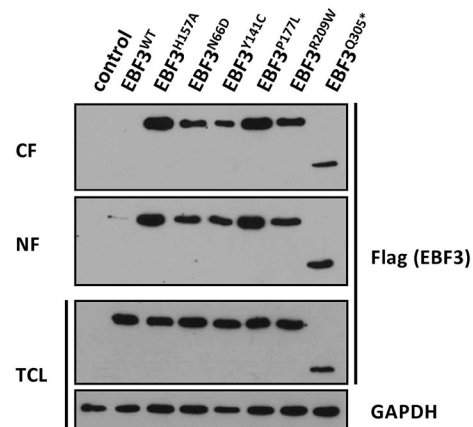

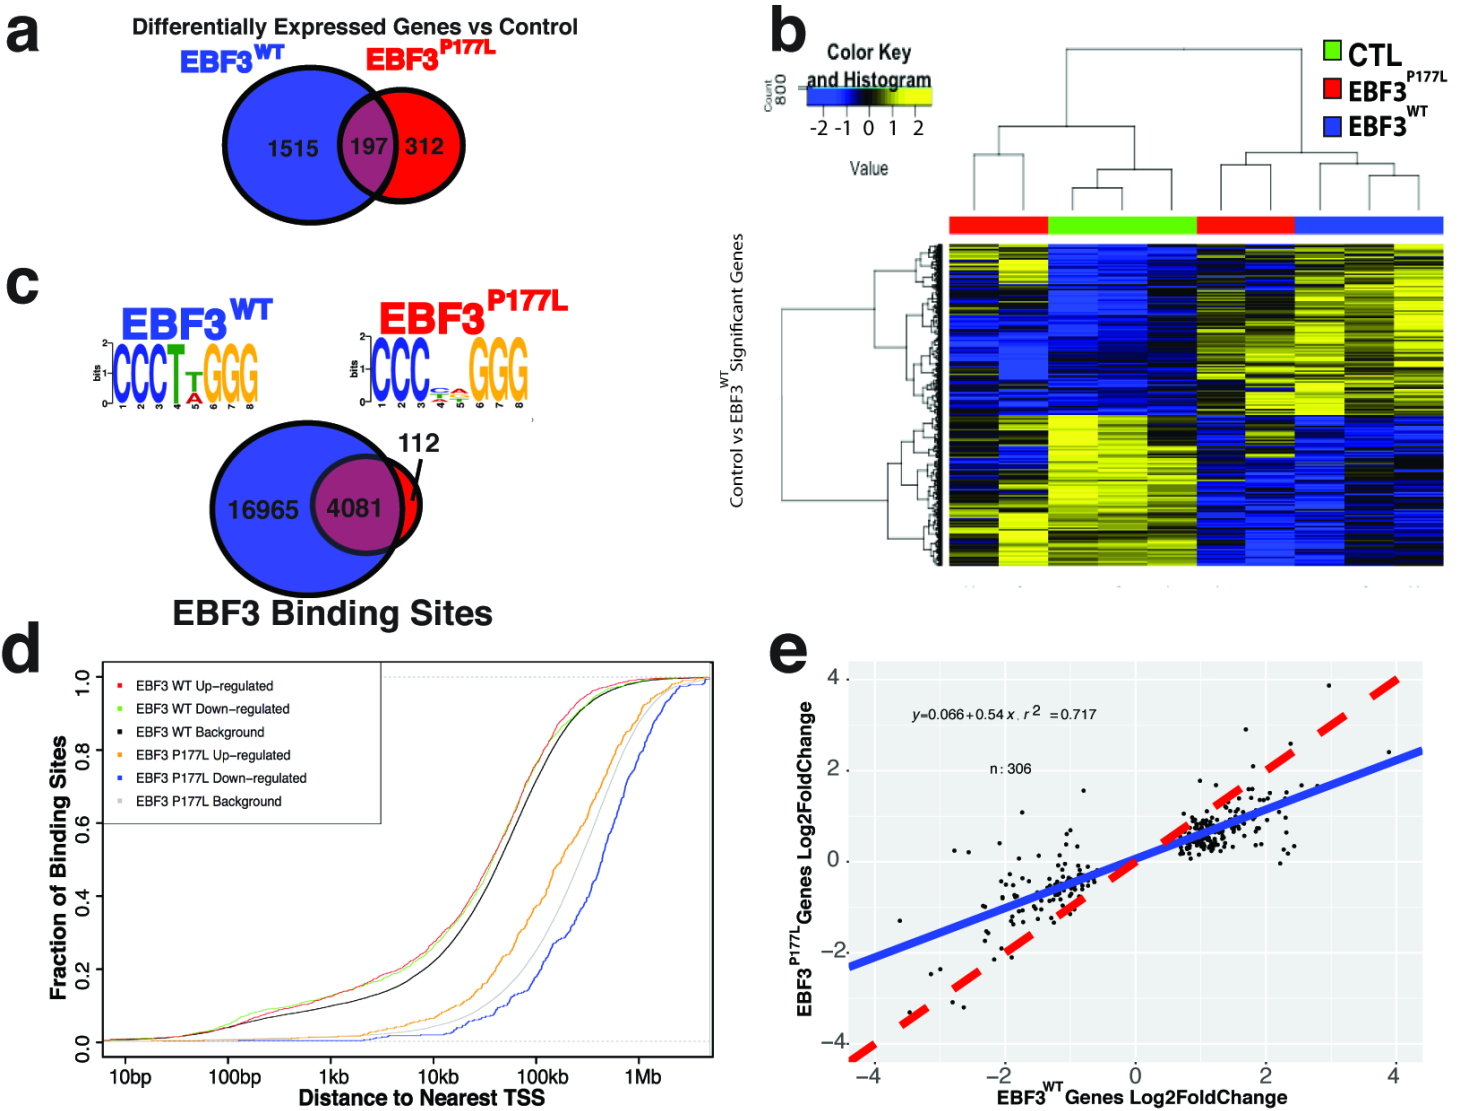

## Material and Methods

**Subjects.** Ten subjects with intellectual disability and additional clinical manifestations were included in the study. Clinical features are summarized in **Supplementary Table 4**. Informed consent for DNA storage and genetic analyses was obtained from the parents of all subjects, and genetic studies were approved by all institutional review boards of the participating institutions. Permission to publish photographs was given for all subjects shown in **Figure 1c**.

**Exome sequencing and sequence data analysis.** Targeted enrichment and massively parallel sequencing were performed on genomic DNA extracted from circulating leukocytes.

Enrichment of the whole exome was performed according to the manufacturer's protocols using the Nextera Enrichment Kit (62 Mb) (Illumina) for subjects 1 and 2 and their brother (sibling 1)<sup>1</sup>, and the SureSelect Clinical Research Exome kit (54 Mb; Agilent) for subject 10.

Captured libraries were then loaded onto the HiSeq2000 or 2500 platform (Illumina).

Trimmomatic was employed to remove adapters, low quality (phred quality score < 5) bases from the 3' ends of sequence reads<sup>2</sup>. Cutadapt was used for subject 10. Reads shorter than 36 bp were subsequently removed. Further processing was performed following the Genome Analysis Toolkit's (GATK) best practice recommendations. Briefly, trimmed reads were aligned to the human reference genome (UCSC GRCh37/hg19) using the Burrows-Wheeler Aligner (BWA mem v0.7.12). Duplicate reads were marked with Picard tools (v1.141).

GATK (v3.4) was employed for indel realignment, base quality score recalibration, calling variants using the HaplotypeCaller, joint genotyping, and variant quality score recalibration.

AnnoVar (v2015-03-22) was used to functionally annotate and filter alterations against public databases (dbSNP138, 1000 Genomes Project, and ExAC Browser). Exonic variants and intronic alterations at exon-intron boundaries ranging from -10 to +10, which were clinically associated and unknown in public databases, were retained. Whole-exome sequencing and data analysis for families 2, 3, and 6 was performed at GeneDx as described previously<sup>3</sup>. For

families 7 and 8, WES and data analysis were performed in Human Genome Sequencing Center (HGSC) at Baylor College of Medicine, according to the previously described protocol and using notably the VCRome capture reagent<sup>4-6</sup>; WES targeted the coding exons of ~20,000 genes with 130X average depth-of-coverage and greater than 95% of the targeted bases with >20 reads<sup>4-6</sup>.

Subjects 5 and 6 (families 4 and 5) were identified as part of a trio-based clinical sequencing study at HudsonAlpha, which to date has performed sequencing on 349 affected probands from 317 families. Genomic DNA was isolated from peripheral blood leukocytes and exome sequencing was conducted to a median depth of ~65X with at least 80% of targeted bases covered at 20X. Exome capture was completed using Nimblegen SeqCap EZ Exome version 3 and sequencing was conducted on the Illumina HiSeq 2000. Reads were aligned to reference hg19 using bwa (0.6.2)<sup>7</sup>. GATK best practice methods<sup>8</sup> were used to identify variants, with samples called jointly in batches of 10-20 trios. Maternity and paternity of each parent was confirmed by whole exome kinship coefficient estimation with KING<sup>9</sup>. *De novo* variants were identified as heterozygous variant calls in the proband in which there were at least 10 reads in both parents and the proband, an alternate allele depth of at least 20% in the proband and less than 5% in each parent, and a minor allele frequency <1% in 1000 Genomes and ExAC. All candidate *de novo* variants that either affected a protein or had a scaled CADD score > 10 (ref. <sup>10</sup>) were manually reviewed, as were variants similarly identified using X-linked, compound heterozygote, and recessive inheritance filters. In each patient described, no other variants were identified as potentially disease-causal.

**Variant validation.** Sequence validation and segregation analysis for all candidate variants were performed by Sanger sequencing. Primer pairs designed to amplify selected coding exons of the *EBF3* gene and exon-intron boundaries (NM\_001005463.2) and PCR conditions are available on request. For families 1 and 9, amplicons were directly sequenced using the

ABI BigDye Terminator Sequencing Kit (Applied Biosystems) and an automated capillary sequencer (ABI 3500; Applied Biosystems). Sequence electropherograms were analysed using Sequence Pilot software (JSI medical systems). For families 4, 5, 7 and 8, Sanger confirmation of variants, including confirmation of absence from both biological parents, was performed by a CAP/CLIA-certified diagnostic laboratory. Genotyping was carried out with the AmpFI STR SGM plus Kit (Applied Biosystems) to confirm paternity and maternity. The effects of the variants were assessed with Combined Annotation-Dependent Depletion (CADD)<sup>11</sup> and by determining the GERP++ scores<sup>12,13</sup>.

**RNA isolation, cDNA synthesis, cloning and colony PCR.** Total RNA was extracted (RNeasy Mini kit, Qiagen) from cultured primary fibroblasts obtained from a skin biopsy of subjects 1 and 2. 1 µg total RNA was reverse transcribed (Superscript<sup>TM</sup> III RT, ThermoFisher) using random hexamers as primers, and 1 µl of the reverse transcription reaction was utilized to amplify a 320-bp *EBF3* cDNA fragment encompassing the c.625C>T variant (forward primer 5'-ACCCACGAGATCATGTGCAG-3', reverse primer 5'-CTGGGACTGATGGCCTTG-3'). The PCR product was directly sequenced.

Exon 7 of *EBF3* and adjacent intronic sequences were amplified from leukocyte- and buccal cell-derived DNA of the mother of subjects 1 and 2. The PCR product was cloned into the pCR2.1 TOPO TA Cloning Vector (ThermoFisher). Individual *E.coli* clones were subjected to colony PCR followed by Sanger sequencing to haplotype determination.

**Structural analysis.** The three-dimensional structure of the DNA-binding domain of wildtype and *EBF3* mutants (amino acids 50-251) was obtained by means of homology modeling using the SWISS-MODEL web-based service<sup>14</sup>. The crystallographic structure at 2.8-Å resolution of *EBF1* bound to DNA (PDB entry 3MLP) was used as a template<sup>15</sup>. The selected template ensured the best homology score (95.9%). The coordinates of the DNA backbone were taken

from the crystal structure of the double-stranded DNA bound to EBF1<sup>15</sup>. Molecular graphics were developed with UCSF Chimera software<sup>16</sup>.

**Plasmid construction and mutagenesis.** The coding region of human wild-type *EBF3* (NM\_001005463.2) was amplified by using *EBF3*-specific PCR primers and cDNA of human fetal brain as template. The forward primers were designed with a 5'-CACC overhang and lacked the start codon sequence. Purified PCR products were cloned into pENTR/D-TOPO vector (ThermoFisher) according to the manufacturer's protocol. *EBF3* single mutations encoding p.His157Ala, p.Asn66Asp, p.Tyr141Cys, p.His157\_Ile159dup, p.Gly171Asp, p.Pro177Leu und p.Arg209Trp were introduced into *EBF3* cDNA with the QuikChange II Site-Directed Mutagenesis Kit (Agilent Technologies). Subsequently, N-terminally FLAG-tagged EBF3 constructs were generated by transferring the coding region into the destination vector pFLAG-CMV4-cassetteA<sup>17</sup>. The coding region of the mutants EBF3<sup>Q305\*</sup> and EBF3<sup>R303\*</sup> and of p53<sup>WT</sup> was amplified by using specific PCR primers and pFLAG-CMV4-EBF3<sup>WT</sup> and LeGO-iG2-Puro+-p53 as templates, respectively. The LeGO-iG2-Puro+-p53 construct was kindly provided by Kristoffer Rieken (University Medical Center Hamburg-Eppendorf, Hamburg, Germany). Cloning into pENTR/D-TOPO and destination vectors was performed as described above. For RNA-sequencing and CHIP-seq experiments EBF3<sup>WT</sup> and EBF3<sup>P177L</sup> cDNA constructs were designed and ordered as synthetic dsDNA gBlocks (IDT) and cloned into a pCMV6-3xFlag-2A-Neomycin vector (modified from pCMV6-AC-GFP, Origene) using Gibson Assembly (NEB) to yield the desired EBF3-3xFlag expression vectors (**Supplementary Fig. 7**). Full vector and cDNA sequences are available on request. All constructs were sequenced for integrity.

**Cell culture and transfection.** HEK 293T (human embryonic kidney) cells and primary fibroblasts were cultured in Dulbecco's modified Eagle medium (DMEM; ThermoFisher)

supplemented with 10% fetal bovine serum (FBS; GE Healthcare) and penicillin-streptomycin (100 U/mL and 100 mg/mL, respectively; ThermoFisher). HEK 293T cells were transfected using TurboFect (ThermoFisher) with a DNA ( $\mu\text{g}$ ): TurboFect ( $\mu\text{l}$ ) ratio of 1:2 for immunocytochemistry and *in situ* fractionation experiments and of 1:1 for transactivation assays.

SK-N-SH (ATCC HTB-11) cells (which do not endogenously express *EBF3*), were obtained from ATCC and grown under recommended growth conditions. *EBF3* constructs were transfected into SK-N-SH cell using Nucleofection (Lonza) kit V using manufacturer's instructions, with the following modifications: 5  $\mu\text{g}$  of *EBF3*<sup>WT</sup> or *EBF3*<sup>P177L</sup> vector was transfected per  $1 \times 10^6$  cells, and three transfections were pooled into one biological replicate for a total of four biological replicates per vector. Cells were selected with 400  $\mu\text{g}/\text{mL}$  G418 (Invitrogen, 10131035) for two weeks and then with 200  $\mu\text{g}/\text{mL}$  for a further 2-3 weeks to generate SK-N-SH cells with stable *EBF3*-3xFlag expression. Biological replicates were maintained under selection as polyclonal pools and expanded for use in functional genomic experimentation.

**Immunocytochemistry.** HEK 293T cells were cultivated on glass coverslips coated with Poly-L-lysine (Sigma Aldrich) and transiently transfected with *EBF3* expression constructs. 24 h after transfection, cells were fixed with 4% paraformaldehyde (Sigma-Aldrich) in PBS. After treatment with permeabilization/blocking solution (2% BSA; 3% goat serum; 0.5% Nonidet P40 in PBS), cells were incubated in antibody solution (3% goat serum; 0.1% Nonidet P40 in PBS) containing mouse monoclonal anti-FLAG M2 antibody (1:200 dilution; clone: F-3165; Sigma-Aldrich). Cells were washed with PBS and incubated with Alexa Fluor-488 coupled goat anti-mouse IgG (1:1000 dilution; ThermoFisher). After extensive washing with PBS, cells were embedded in mounting solution (ProLong Diamond Antifade Mountant



with DAPI; ThermoFisher). Cells were analyzed with Olympus IX-81 epifluorescence microscope equipped with a 60x Plan Apo N oil immersion objective lens.

**Transactivation assay.** For transactivation assays, HEK 293T cells were transiently transfected to express the construct(s) of interest, together with the pGL2-p21 (CDKN1A) promoter-Luc<sup>18</sup> and pRen using a 1:1:3 ratio of pREN(2 µg):pGL2-p21 promoter-Luc(2 µg):pFLAG-CMV4-EBF3 or pFLAG-CMV4-p53<sup>WT</sup>(6 µg) expression constructs. For co-expression experiments with EBF3<sup>WT</sup> and mutant EBF3, a 1:1:2:2 ratio of pREN:pGL2-p21 promoter-Luc:pFLAG-CMV4-EBF3<sup>WT</sup>:pFLAG-CMV4-EBF3<sup>mut</sup> was used. For titration experiments (with wild-type EBF3 and either EBF3<sup>N66D</sup> or EBF3<sup>Q305\*</sup>) cells were transfected with a constant amount of wild-type EBF3 (4 µg) and an increasing amount of the EBF3 mutant constructs. Transactivation assays performed to analyze the dose-dependent activation of wild-type EBF3 on the pGL2-p21 promoter-Luc construct documented that a maximum activation was attained with 6 to 8 µg of wild-type EBF3 construct (**Supplementary Fig. 8**). The pGL2-p21 promoter-Luc was a gift from Martin Walsh (Addgene plasmid #33021) and encodes *Photinus* luciferase. The eukaryotic expression vector pREN is a derivative of the pFiRe-basic<sup>19</sup> containing a recombinant gene that is under the control of cytomegalovirus immediate early promoter and encodes *Renilla* luciferase kindly provided by Stefan Kindler (University Medical Center Hamburg-Eppendorf, Hamburg, Germany). The Dual-Luciferase Reporter Assay System (Promega) was performed according to the manufacturer's protocol with cell extracts prepared 48 h after transfection. Data were normalized to the activity of *Renilla* luciferase, and basal promoter activity for transfection with pFLAG-CMV4-cassetteA (control vector) was considered 1. All assays were performed in triplicate.

**In situ subcellular fractionation.**  $3.5 \times 10^5$  HEK 293T cells were seeded on 6-well plates and incubated under normal growth condition overnight. 24 h after transfection of cells with

EBF3 expression constructs or pFLAG-CMV4-cassetteA (control vector), *in situ* subcellular fractionation was performed as described previously<sup>20</sup>. Briefly, cells were washed twice with ice-cold PBS, followed by a 1 min incubation on ice with 500  $\mu$ L CSK buffer (10 mM PIPES, pH 6.8; 100 mM NaCl; 300 mM sucrose; 3 mM MgCl<sub>2</sub>; 1 mM EGTA) supplemented with 0.1% Triton-X. The cytoplasmic fraction (CF) was removed and proteins were precipitated with 1 M (NH<sub>4</sub>)<sub>2</sub>SO<sub>4</sub> at 4°C under rotating conditions. Subsequently, cells were washed with ice-cold PBS and then incubated for 20 min on ice with 500  $\mu$ L CSK buffer supplemented with 0.5% Triton-X. The nuclear fraction (NF) encompassing nuclear proteins and proteins loosely bound to chromatin was removed and proteins were precipitated. Total cell lysate (TCL) was prepared from a separate well by adding 750  $\mu$ L TES buffer (1% SDS; 2 mM EDTA; 20 mM Tris-HCl, pH 7.4) for 1 min at room temperature. TCL was removed and proteins were precipitated. Samples were centrifuged at 14,000 rpm for 30 min at 4°C and protein pellets were resuspended in 1x SDS loading buffer. Proteins were separated on 12.5% SDS-polyacrylamide gels and transferred to PVDF (polyvinylidene difluoride) membranes. Following blocking (20 mM Tris-HCl, pH 7.4; 150 mM NaCl; 0.1% Tween-20; 5% nonfat dry milk) and washing (20 mM Tris-HCl, pH 7.4; 150 mM NaCl; 0.1% Tween-20) membranes were incubated in primary antibody solution (20 mM Tris-HCl, pH 7.4; 150 mM NaCl; 0.1% Tween-20) containing mouse monoclonal anti-FLAG M2 peroxidase conjugate (1:50,000 dilution; Sigma-Aldrich). After final washing, immunoreactive proteins were visualized using the Immobilon Western Chemiluminescent HRP substrate (Sigma-Aldrich). For control of equal loading, TCL was analyzed using mouse anti-GAPDH antibody (1:10,000 dilution; Abcam) in primary antibody solution containing 0.5% nonfat dry milk. Membranes were washed and incubated with peroxidase-coupled anti-mouse IgG (1:10,000 dilution; GE Healthcare).

**RNA-seq.** Total RNA was harvested from control SK-N-SH cells and SK-N-SH cells stably expressing *EBF3*<sup>WT</sup> or *EBF3*<sup>P177L</sup> using the Norgen Total RNA Preparation Kit (Norgen Biotek). cDNA was prepared using the ThermoFisher High-Capacity RNA-to-cDNA Kit (ThermoFisher). RNA-seq libraries were prepared with Nextera DNA Library Sample Prep Kit using established protocols<sup>21</sup>. Libraries were sequenced on an Illumina HiSeq2500 with 50-bp paired-end sequencing. All statistical analyses were performed in R (Version 3.2.1). RNA-seq reads were processed using a custom pipeline implementing aRNApipe<sup>22</sup> to perform low-quality read filtering, adaptor trimming, alignment with STAR<sup>23</sup>, and generate the final count table for samples passing an unambiguously-mapped alignment rate cutoff of at least 40%. To perform differential gene expression analysis, we used the R DESeq2 package<sup>24</sup> and likelihood ratio test (LRT) hypothesis testing with an adjusted p-value (FDR) cutoff of 0.05. Heatmap and gene expression boxplots were generated using variance stabilized counts generated with DESeq2. GO Term enrichment was performed using the online tool g:Profiler<sup>25</sup> with all GO term annotation categories.

**ChIP-seq.** Currently, fewer than 10% of antibodies tested for use in ChIP-seq have met quality control metrics set by ENCODE<sup>26,27</sup>, and lack of high-affinity antibodies for proteins bound to fixed chromatin has been a major impediment to investigation of neurodevelopmental TF binding<sup>28</sup>. Additionally, available anti-EBF3 antibodies have been found to have some degree of cross reactivity with other EBF family members, potentially limiting interpretability of specific family member binding sites<sup>29</sup>. Although *EBF1* and *EBF2* are not expressed in the SK-N-SH cell line, *EBF4* is expressed highly. Thus, we chose to perform ChIP against tagged EBF3 protein rather than rely on native anti-EBF3 antibodies (high-affinity FLAG antibody that targets the C-terminal 3X-FLAG epitope of the *EBF3* cDNA constructs). *EBF3*<sup>WT</sup> and *EBF3*<sup>P177L</sup> genome-wide binding site identification was performed with ChIP-seq using established methods<sup>30</sup>. Briefly, 20 x 10<sup>6</sup> cells for two

biological replicates for each vector were crosslinked in 1% formaldehyde, sonicated to fragment chromatin using the BioRuptor Twin Sonicator (Diagenode), and immunoprecipitated using monoclonal anti-FLAG M2 antibody (Sigma). Samples were reverse-crosslinked and recovered DNA was used as input for Illumina sequencing library preparation. Libraries were sequenced on an Illumina NextSeq with single-end 150 bp sequencing. ChIP-seq reads were aligned using the BWA aligner to hg19 and peaks were identified for each replicate using MACS2.1.0<sup>31</sup> with an  $-m$ fold cutoff of (10,30). Replicate overlapping peaks were merged using BEDTools<sup>32</sup> to generate final peak lists used in downstream analyses. Motif identification was performed using MEME-Suite<sup>33</sup> with HOCOMO (v10) with final peaks sequences trimmed to a centered 100 base pair window.

**Statistical analysis.** Differences in the distribution of continuous variables between groups were evaluated for statistical significance using two-paired Student's  $t$  test. In all comparisons,  $P$  values of  $\leq 0.05$  were considered to be statistically significant.

#### References:

1. Kortüm, F. *et al.* Mutations in KCNH1 and ATP6V1B2 cause Zimmermann-Laband syndrome. *Nat Genet* **47**, 661–667 (2015).
2. Bolger, A.M., Lohse, M. & Usadel, B. Trimmomatic: a flexible trimmer for Illumina sequence data. *Bioinformatics* **30**, 2114–2120 (2014).
3. Tanaka, A.J. *et al.* De novo pathogenic variants in CHAMP1 are associated with global developmental delay, intellectual disability, and dysmorphic facial features. *Cold Spring Harb Mol Case Stud* **2**, a000661 (2016).
4. Bainbridge, M.N. *et al.* Targeted enrichment beyond the consensus coding DNA sequence exome reveals exons with higher variant densities. *Genome Biol* **12**, R68 (2011).

5. Yang, Y. *et al.* Clinical whole-exome sequencing for the diagnosis of mendelian disorders. *N Engl J Med* **369**, 1502–1511 (2013).
6. Yang, Y. *et al.* Molecular findings among patients referred for clinical whole-exome sequencing. *JAMA* **312**, 1870–1879 (2014).
7. Li, H. & Durbin, R. Fast and accurate short read alignment with Burrows-Wheeler transform. *Bioinformatics* **25**, 1754–1760 (2009).
8. DePristo, M.A. *et al.* A framework for variation discovery and genotyping using next-generation DNA sequencing data. *Nat Genet* **43**, 491–498 (2011).
9. Manichaikul, A. *et al.* Robust relationship inference in genome-wide association studies. *Bioinformatics* **26**, 2867–2873 (2010).
10. Kircher, M. *et al.* A general framework for estimating the relative pathogenicity of human genetic variants. *Nat Genet* **46**, 310–315 (2014).
11. Kircher, M. *et al.* A general framework for estimating the relative pathogenicity of human genetic variants. *Nat Genet* **46**, 310–315 (2014).
12. Cooper, G.M. *et al.* Distribution and intensity of constraint in mammalian genomic sequence. *Genome Res* **15**, 901–913 (2005).
13. Davydov, E.V. *et al.* Identifying a high fraction of the human genome to be under selective constraint using GERP++. *PLoS Comput Biol* **6**, e1001025 (2010).
14. Schwede, T., Kopp, J., Guex, N. & Peitsch, M.C. SWISS-MODEL: An automated protein homology-modeling server. *Nucleic Acids Res* **31**, 3381–3385 (2003).
15. Treiber, N., Treiber, T., Zocher, G. & Grosschedl, R. Structure of an Ebf1:DNA complex reveals unusual DNA recognition and structural homology with Rel proteins. *Genes Dev* **24**, 2270–2275 (2010).
16. Pettersen, E.F. *et al.* UCSF Chimera--a visualization system for exploratory research and analysis. *J Comput Chem* **25**, 1605–1612 (2004).

17. Rosenberger, G., Jantke, I., Gal, A. & Kutsche, K. Interaction of alphaPIX (ARHGEF6) with beta-parvin (PARVB) suggests an involvement of alphaPIX in integrin-mediated signaling. *Hum Mol Genet* **12**, 155–167 (2003).
18. Nishio, H. & Walsh, M.J. CCAAT displacement protein/cut homolog recruits G9a histone lysine methyltransferase to repress transcription. *Proc Natl Acad Sci U S A* **101**, 11257–11262 (2004).
19. Schütt, J. *et al.* Fragile X mental retardation protein regulates the levels of scaffold proteins and glutamate receptors in postsynaptic densities. *J Biol Chem* **284**, 25479–25487 (2009).
20. Sawasdichai, A. *et al.* In situ subcellular fractionation of adherent and non-adherent mammalian cells. *J Vis Exp* (2010).
21. Gertz, J. *et al.* Transposase mediated construction of RNA-seq libraries. *Genome Res* **22**, 134–141 (2012).
22. Alonso, A. *et al.* aRNApipe: A balanced, efficient and distributed pipeline for processing RNA-seq data in high performance computing environments. *bioRxiv* (2016).
23. Dobin, A. *et al.* STAR: ultrafast universal RNA-seq aligner. *Bioinformatics* **29**, 15–21 (2013).
24. Love, M.I., Huber, W. & Anders, S. Moderated estimation of fold change and dispersion for RNA-seq data with DESeq2. *Genome Biol* **15**, 550 (2014).
25. Reimand, J. *et al.* g:Profiler—a web server for functional interpretation of gene lists (2016 update). *Nucleic Acids Res* **44**, W83–W89 (2016).
26. Landt, S.G. *et al.* ChIP-seq guidelines and practices of the ENCODE and modENCODE consortia. *Genome Res* **22**, 1813–1831 (2012).

27. Savic, D. *et al.* CETCh-seq: CRISPR epitope tagging ChIP-seq of DNA-binding proteins. *Genome Res* **25**, 1581–1589 (2015).
28. Nord, A.S., Pattabiraman, K., Visel, A. & Rubenstein, J.L. Genomic perspectives of transcriptional regulation in forebrain development. *Neuron* **85**, 27–47 (2015).
29. Rajakumari, S. *et al.* EBF2 determines and maintains brown adipocyte identity. *Cell Metab* **17**, 562–74 (2013).
30. Reddy, T.E. *et al.* Genomic determination of the glucocorticoid response reveals unexpected mechanisms of gene regulation. *Genome Res* **19**, 2163–2171 (2009).
31. Zhang, Y. *et al.* Model-based analysis of ChIP-Seq (MACS). *Genome Biol* **9**, R137 (2008).
32. Quinlan, A.R. & Hall, I.M. BEDTools: a flexible suite of utilities for comparing genomic features. *Bioinformatics* **26**, 841–842 (2010).
33. Bailey, T.L. *et al.* MEME SUITE: tools for motif discovery and searching. *Nucleic Acids Res* **37**, W202–W208 (2009).
